# Supplementary material
Source: PubMed Central journal article supplement (PMC5878960)
Supplement: supp_6.1.E139_2017-0084_original_submission.pdf [file supp_6.1.E139_2017-0084_original_submission.pdf]

1  
2  
3 1 **TITLE PAGE**  
4

5 2 Full title: **Clinical presentation of Lyme disease cases in the higher-risk region of Québec: a**  
6  
7 **retrospective descriptive study**  
8

9  
10 4 Running Head: Lyme in La Pommeraie  
11

12 5 Audrey Charbonneau MD<sup>1</sup>, Louis-Philippe Charette MD<sup>1</sup>, Geneviève Rouleau MD<sup>1</sup>, Mélissa  
13  
14 6 Savary MD<sup>1</sup>, Alexandra Wilson MD<sup>1</sup>, Emily Heer<sup>2</sup>, Karine Bériault MD<sup>1</sup>, Alexandra de  
15  
16 7 Pokomandy MDCM MSc<sup>1,3</sup>  
17  
18

19 8 1. Family Medicine Unit La Pommeraie (Cowansville), Department of Family Medicine,  
20  
21 Université de Sherbrooke, QC, Canada  
22

23  
24 10 2. Department of Public Health, McGill University, QC, Canada  
25

26 11 3. Department of Family Medicine, McGill University, QC, Canada  
27

28 12 **Address correspondence to:** Alexandra de Pokomandy, McGill University Health Centre –Glen  
29  
30 site, 1001 Decarie Blvd., Rm D02-4110, Montreal (QC), H4A 3J1, Canada.  
31

32  
33 14 E-mail: [alexandra.depokomandy@mcgill.ca](mailto:alexandra.depokomandy@mcgill.ca)  
34

35 15 **Funding:** No funding was obtained to complete this study. ADP received salary support from  
36  
37 Fonds de Recherche du Québec - Santé (FRQS) and Fédération des Omnipraticiens du Québec  
38  
39 (FMOQ) through LE-250 scholarship.  
40

41  
42 18 **Conflict of interests:** The authors declare no conflict of interest with this work.  
43

44 19 **Acknowledgements:** We thank Dr Sophie Michaud, infectious diseases specialist at Brome-  
45  
46 Missisquoi-Perkins Hospital for her support and collaboration in this project, and Christina de  
47  
48 Castro at the McGill University Health Centre for her support in ethics submission, data  
49  
50 21 collection and study management.  
51  
52 22

53  
54 23 **Number of Tables: 2; Number of Figures: 2**  
55  
56  
57  
58  
59  
60

1  
2  
3 24 **ABSTRACT**  
4

5 25 **Background:** Lyme disease is emerging in Canada and Québec. This study aimed to describe  
6  
7  
8 26 the use of Lyme serology in La Pommeraie health region between 2012-2015, and to describe the  
9  
10 27 clinical presentations of people with positive serology.  
11

12 28 **Methods:** All patients for whom a Lyme serology was requested at the Brome-Missisquoi-  
13  
14  
15 29 Perkins Hospital's laboratory between 2012-2015 were identified and their charts were reviewed  
16  
17 30 for serology results. Laboratory diagnosis was based on a two-tiered testing. A retrospective  
18  
19 31 chart review for clinical presentation was then conducted for people assessed at the hospital or at  
20  
21 32 the Family Medicine Unit La Pommeraie.  
22

23  
24 33 **Results:** Between 2012-2015, 720 persons were investigated for Lyme disease, which represent  
25  
26 34 a fivefold increase in serology requests from 2012 (53) to 2015 (273). A total of 59 cases were  
27  
28 35 positive for IgM (50) or IgG only (9) by two-tiered testing. For 29 IgM positive cases, the most  
29  
30 36 common symptoms were fever (59%), fatigue (48%), myalgia (41%) and erythema migrans  
31  
32 37 (48%), but 79% had some cutaneous manifestation. Tick bite was reported by only 38%. Lyme  
33  
34 38 serology was IgM or IgG positive for 34% of people presenting with erythema migrans and  
35  
36 39 investigated for Lyme disease.  
37  
38  
39

40 40 **Interpretations:** There has been a clear increase in Lyme awareness and serology requests in La  
41  
42 41 Pommeraie area over recent years. Cutaneous manifestations, fever and myalgia remain common  
43  
44 42 features of IgM positive cases. The majority did not report a history of tick bite.  
45

46  
47 43  
48  
49 44 **Key Words:** Lyme, tick, *Borrelia burgdorferi*, Family Medicine, Resident, Québec  
50  
51 45  
52  
53 46  
54  
55  
56  
57  
58  
59  
60

## 47 INTRODUCTION

48 Lyme disease is emerging in Canada.[1-3] In Quebec, only 2 cases were reported in  
49 2004, compared to 160 cases in 2015.[4, 5] This disease is caused by the spirochete *Borrelia*  
50 *burgdorferi* present in the saliva of infected ticks.[5] Untreated, the infection can affect multiple  
51 organs, including the skin, the heart, the eyes, the central and peripheral nervous system, and the  
52 musculoskeletal system.[5] Quebec guidelines recommends a Lyme serology in the presence of  
53 erythema migrans or in the presence of any symptom suggestive of Lyme disease, even without  
54 an observed tick bite.[6] Symptoms include fatigue, headache, anorexia, fever, regional  
55 lymphadenopathy, myalgia and diffuse arthralgia.[6] These are non-specific complaints  
56 frequently encountered in primary care, which makes it difficult for primary caregivers or  
57 emergency physicians to determine when to order Lyme disease serology.

58 Considering the serious consequences of this condition and its increasing prevalence,  
59 medical residents from the Family Medicine Unit La Pommeraie (Université de Sherbrooke)  
60 designed this research project to inform clinical decision-making on screening for Lyme disease.  
61 The first objective of this study was to review the use of serology requests sent to the Brome-  
62 Missisquoi-Perkins hospital microbiology laboratory between 2012 and 2015, and the proportion  
63 of positive results. The second objective was to describe the most commonly reported clinical  
64 presentations of the laboratory confirmed cases and to examine the proportion of confirmed  
65 diagnoses in people presenting with erythema migrans and investigated for Lyme disease.

## 67 METHODS

### 68 Study setting

1  
2  
3 69 An analysis of the Public Health expertise and reference centres of Quebec ranked  
4  
5 70 municipalities by level of risk.[7] The only high-risk municipality in Quebec was Farnham,  
6  
7 71 where more than 20% of ticks were infected with *Borrelia burgdorferi*.[7] This municipality as  
8  
9  
10 72 well as five others considered as moderate risk (Brigham, Bromont, Cowansville, Saint-Armand,  
11  
12 73 and Sutton),[7] are served by the Brome-Missisquoi-Perkins Hospital, located in Cowansville.  
13  
14 74 This hospital is a primary care hospital offering outpatients and inpatients health care services,  
15  
16 75 with 84 short-term beds and 12 long-term beds. It is part of the Centre intégré universitaire de  
17  
18 76 santé et de services sociaux de l'Estrie – Centre hospitalier universitaire de Sherbrooke, and  
19  
20 77 provides medical services for the population living in the local health and social service network  
21  
22 78 La Pommeraie, i.e. 22 municipalities: Abercorn, Frelighsburg, Saint-Armand, Pike River,  
23  
24 79 Stanbridge Station, Bedford Township, Stanbridge East, Dunham, Sutton, West Bolton, Brome,  
25  
26 80 Brome Lake, Cowansville, East Farnham, Brigham, Saint-Ignace-de-Stanbridge, Notre-Dame-  
27  
28 81 de-Stanbridge, Sainte-Sabine, Farnham, Ange-Gardien, and Sainte-Brigide-d'Iberville. During  
29  
30 82 the study period (2012-2015), it also provided services for Bromont and Waterloo. Lyme  
31  
32 83 serology ordered by a physician working in this hospital or at one of the 14 medical clinics on  
33  
34 84 this local network are first sent to the microbiology laboratory of the Brome-Missisquoi-Perkins  
35  
36 85 hospital. In Québec, laboratory diagnosis is made through a two-tiered testing as recommended  
37  
38 86 by the Center for Diseases Control and Prevention[8]; specimens are first tested through enzyme  
39  
40 87 immunoassay (EIA), and only specimens that are EIA-positive are sent for further analysis to the  
41  
42 88 National Microbiology Laboratory in Winnipeg where EIA is repeated and positive results are  
43  
44 89 processed to complete Western Blot testing for IgM and IgG[6]. We began our data collection in  
45  
46 90 2012 because there was only 28 cases of Lyme disease reported in Québec in 2011, and the  
47  
48 91 rising incidence began thereafter.[4]  
49  
50  
51  
52  
53  
54  
55  
56  
57  
58  
59  
60

1  
2  
3 92  
45 93 **Study design**  
6

7 94 The study was a retrospective descriptive study based on chart reviews, and ethics  
8 95 approval was provided by the research ethics board of the Centre de Recherche du Centre  
9  
10 96 Hospitalier Universitaire de Sherbrooke.

11  
12  
13  
14 97 For the first objective, we included all people who had Lyme serology requested at the  
15 98 microbiology laboratory of the Brome-Missisquoi-Perkins Hospital between January 1<sup>st</sup> 2012  
16  
17 99 and December 31<sup>st</sup> 2015, as provided by the microbiology laboratory of the hospital. Electronic  
18  
19 100 chart reviews were conducted to collect gender, age at testing, postal code of residence, and  
20  
21 101 Lyme serology results from both local and National Microbiology Laboratory. Serology kits  
22  
23 102 used in most cases were VIDAS for the first local test, and Immunitics C6 and Euroimmun  
24  
25 103 Western Blot at the National Laboratory.

26  
27  
28  
29  
30 104 For the second objective, we included the same study population as for objective 1, and  
31 105 excluded all people for whom the medical charts of the Brome-Missisquoi-Perkins Hospital or  
32  
33 106 the Family Medicine Unit LaPommeraiie did not contain information related to the Lyme  
34  
35 107 serology requests, were unreadable or incomplete. The medical chart of people assessed in other  
36  
37 108 outpatient medical clinics of the local health network La Pommeraiie was not accessible by our  
38  
39 109 research team. Medical charts were reviewed by the 5 first co-authors using a paper case report  
40  
41 110 form created and piloted at the beginning of the study to standardize data collection between  
42  
43 111 researchers. The form required simple box ticking (yes/no or multiple choice) or date entry.  
44  
45 112 Minimal text entry was possible when “other” was selected. The information collected included  
46  
47 113 data specific risk factors (history of travel or tick bite); systemic signs and symptoms reported  
48  
49 114 (fever, fatigue, headache, anorexia, lymphadenopathy, malaises, lethargy or alteration in level of  
50  
51  
52  
53  
54  
55  
56  
57  
58  
59  
60

1  
2  
3 115 consciousness); skin manifestations (erythema migrans or other cutaneous lesion);  
4  
5 116 musculoskeletal symptoms (myalgia, arthralgia, migratory pains, arthritis, other); neurological  
6  
7 117 signs or symptoms (nuchal rigidity, facial paralysis, meningitis, encephalitis, polyradiculopathy,  
8  
9 118 other); cardiac manifestations (atrial-ventricular blocks, myocarditis, pericarditis, other) and  
10  
11 119 ophthalmologic manifestation (conjunctivitis, keratitis, uveitis, optic neuritis, other). Case report  
12  
13 120 forms were formatted to allow scanning using Teleform software for data entry. All data entered  
14  
15 121 was then reviewed for verification of concordance with the paper forms.  
16  
17  
18  
19 122

## 21 123 **Statistical analyses**

22  
23  
24 124 Descriptive analyses with 95% confidence intervals (95%CI) were calculated to answer  
25  
26 125 the study objectives. Only the results of the confirmatory IgM and IgG serologies performed at  
27  
28 126 the National Microbiology laboratory were considered to identify cases. If a person had more  
29  
30 127 than one serology completed, the first test with positive IgM was retained. If never positive for  
31  
32 128 IgM, we retained the first specimen positive for IgG, or the first test if always negative. For the  
33  
34 129 chart review, signs and symptoms were categorized as “no” if they were not mentioned in the  
35  
36 130 medical note. Statistical analyses were performed with Stata software, version 11.2.  
37  
38  
39

40 131

## 42 132 **RESULTS**

### 44 133 **Total Lyme serology performed at BMP hospital**

45  
46  
47 134 Of the 720 persons investigated for Lyme disease at the Brome-Missisquoi-Perkins  
48  
49 135 Hospital laboratory between January 1<sup>st</sup> 2012 and December 31<sup>st</sup> 2015, 3 were excluded because  
50  
51 136 their results were unavailable. **Figure 1** presents a flow diagram of their results. In these 717, 59  
52  
53 137 were either positive for IgM (50) or IgG only (9). **Figure 2a)** presents the number of tests  
54  
55  
56  
57  
58  
59  
60

1  
2  
3 138 requested per year, and the proportion of those that were positive. Over the course of the 4 years  
4  
5 139 studied, the annual number of requests for serology increased by almost fivefold, from 53 in  
6  
7 140 2012 to 273 in 2015. The proportion of positive local tests (first EIA) also increased, but the  
8  
9 141 number of confirmed cases through Western Blot testing at the National Laboratory only  
10  
11 142 increased from 2012 (3 cases) to 2013, and remained at around 18-19 cases per year from 2013  
12  
13 143 to 2015. **Figure 1b)** demonstrates the results per month of the year (all years combined).  
14  
15 144 Considerably more serology requests and laboratory diagnoses were made between June and  
16  
17 145 October, particularly in July. **Table 1** presents demographic characteristics of the people with  
18  
19 146 confirmed positive IgM or IgG serology. The majority were men (67.80%, 95%CI: 54.36-  
20  
21 147 79.38), aged 20-39 (35.59%, 95%CI: 23.55-49.13) or 40-59 (28.81%, 95%CI: 17.76-42.08), and  
22  
23 148 lived in Cowansville (27.12%, 95%CI: 16.36-40.27) or Bromont (32.30%, 95%CI: 20.62-45.64).  
24  
25  
26  
27  
28  
29

### 30 31 150 **Clinical presentation of people with a positive Lyme serology result**

32  
33 151 Medical chart review was completed for 38 of the 59 laboratory confirmed cases; 29 were  
34  
35 152 IgM positive, and 9 were IgM negative but IgG positive. All of them were investigated in  
36  
37 153 outpatient contexts; 22 (57.89%) were assessed in the emergency room, and 16 (42.11%) were  
38  
39 154 seen at outpatient clinics.  
40  
41

42 155 Signs and symptoms reported for these confirmed cases of Lyme disease are presented in  
43  
44 156 **Table 2**, for all verified symptoms. Fever (52.63%, 95%CI: 35.82-69.02), fatigue (47.37%,  
45  
46 157 95%CI: 30.98-64.18), headaches (31.58%, 95%CI: 17.50-48.65), myalgia (39.47%, 95%CI:  
47  
48 158 24.04-56.61) were commonly reported. Erythema migrans was specifically reported in 39.47%  
49  
50 159 (95%CI: 24.04-56.61) of medical charts, and this proportion reached 48.28% (95%CI: 29.45-  
51  
52 160 67.47) for people who were positive for IgM. Other cutaneous symptoms such as rash or  
53  
54  
55  
56  
57  
58  
59  
60

1  
2  
3 161 cellulitis were also commonly reported, such that cutaneous manifestations were present in  
4  
5 162 71.05% (95%CI: 54.10-84.58) of cases. For people positive for IgM, 79.31% (95%CI: 60.28-  
6  
7 163 92.01) had reports of cutaneous manifestations. Four cases presented with facial paralysis  
8  
9 164 (10.53%, 95%CI: 2.94-24.80), but otherwise neurological, cardiac and ophthalmic presentations  
10  
11 165 were rare. A tick bite was reported by 31.58% (95%CI: 17.50-48.65) of cases and 37.93%  
12  
13 166 (95%CI: 20.69-57.74) of IgM positive cases.  
14  
15

16  
17 167 Of the 278 people investigated for Lyme disease and for whom medical chart could be  
18  
19 168 reviewed, 44 (15.83%, 95%CI: 11.74-20.66) were reported to present with erythema migrans.  
20  
21 169 Therefore, of the 44 people presenting with erythema migrans as per the medical chart, 14  
22  
23 170 (31.82%, 95%CI: 18.61-47.58) had IgM positive serology, 1 (2.27%, 95%CI: 0.06-12.02) were  
24  
25 171 only positive for IgG and 29 (65.91%, 95%CI: 50.08-79.51) did not have a laboratory diagnosis  
26  
27 172 of Lyme disease.  
28  
29  
30

31 173

## 32 174 **INTERPRETATION**

### 33 175 **Main findings**

34  
35  
36  
37 176 We identified a steep rise in Lyme serology requests at Brome-Missisquoi-Perkins Hospital  
38  
39 177 between 2012 and 2015, but a relatively stable number of cases per year (18-19) from 2013 to  
40  
41 178 2015. Confirmed cases were most common in men, aged 20 to 59 years old, and living in  
42  
43 179 Cowansville or Bromont. Only 38% reported a tick bite. The most common symptoms reported  
44  
45 180 for cases of laboratory confirmed Lyme disease were fever, fatigue, myalgia and headaches.  
46  
47 181 Cutaneous findings were present in 71% of cases, but erythema migrans was specifically  
48  
49 182 identified in only 39% of all cases, and 48% of IgM positive cases.  
50  
51  
52  
53

54 183



## 184 **Explanations and comparison with other studies**

185           The progression in the number of Lyme disease cases in this area is consistent with the  
186 migration of ticks from the northeast United States to Canada[9]. Although a study from the  
187 National Public Health Institute of Québec identified that Farnham was the only high-risk region  
188 in the province, we only had 4 cases of Farnham seen at the hospital for Lyme disease  
189 investigation. It is possible that people living in Farnham consulted in other regions to complete  
190 their lab results, so we cannot draw specific conclusions about this area. However, the high  
191 number of cases identified in Bromont and Cowansville should raise concern that people living  
192 in those areas are at high risk, whether this being due to the presence of ticks in their residential  
193 areas, or to a higher exposure to ticks through a higher prevalence of practicing outdoor activities  
194 in wooded areas. Tick bites were only reported by 38%, which is consistent with previous  
195 reports.[6] This low frequency could also be due to the limitations of retrospective studies, as  
196 physician questionnaires and chart reporting on tick bites may vary, especially in cases where  
197 Lyme was not considered as the most likely diagnosis.

198           The most commonly reported symptoms are not specific to Lyme disease, and illustrate  
199 the challenge in properly diagnosing Lyme disease. Cutaneous manifestations were very  
200 common, although many were not reported as erythema migrans but as rash or cellulitis.  
201 Misclassification is possible here as some of the undefined rash or cellulitis could have been  
202 erythema migrans, and it is not possible from retrospective chart review to verify if the erythema  
203 migrans were properly diagnosed. A recent publication suggested that physicians in Québec  
204 possibly misdiagnosed erythema migrans in 63% of patients, requested unnecessary serology in  
205 56%, and that 97% of prophylaxis prescription were not justified.[10] Clinical diagnosis of  
206 Lyme disease can be done without serology testing when a patient presents with a typical

1  
2  
3 207 erythema migrans of at least 5 cm, occurring in season and with a history of exposure to ticks in  
4  
5 208 which case antibiotic treatment should be given irrespective serological results.[11-14] However,  
6  
7 209 the 2013 Québec recommendations suggest serology testing in the presence of any signs or  
8  
9 210 symptoms compatible with Lyme disease.[6] Our results confirms that fever, fatigue, myalgia  
10  
11 211 and cutaneous presentations remain the most likely presentation of Lyme disease. Although only  
12  
13 212 four cases in our study population presented with facial paralysis, a recent report from England  
14  
15 213 suggests that the combination of Bell's palsy with Lyme disease is increasing, and recommended  
16  
17 214 physicians to suspect Lyme disease when seeing patients with facial palsy.[15]  
18  
19  
20

### 21 **Limitations**

22  
23  
24 216 The main limitation of this study is the potential information bias due to the retrospective  
25  
26 217 nature of the study, and selection bias since the medical records were limited to those of the  
27  
28 218 hospital. It is possible that cases presenting with classic clinical features of erythema migrans,  
29  
30 219 fever and history of tick bites were most likely to be managed entirely out of the hospital and that  
31  
32 220 more atypical presentations were most likely to be referred to the hospital for specialist opinion.  
33  
34  
35 221 Also, it was not possible to properly obtain the duration of symptoms from chart reviews,  
36  
37 222 information that should be considered in the clinical diagnosis of Lyme disease. We thus relied  
38  
39 223 on laboratory diagnosis. Since the majority of our cases were IgM positive, we could not identify  
40  
41 224 striking differences between acute or later presentations. We could also not assess pet ownership  
42  
43 225 as a previously reported risk factor [16, 17]. The generalizability of results may be limited for  
44  
45 226 other areas in Canada, as the prevalence of Lyme disease varies considerably by region.  
46  
47  
48

### 49 **Conclusions and implications for practice and future research**

50  
51 228 The rising incidence of Lyme disease is an important public health concern in Canada,  
52  
53 229 and data from areas with higher prevalence may guide primary care physicians in properly  
54  
55  
56  
57  
58  
59  
60

1  
2  
3 230 including Lyme disease in their differential diagnosis, and use Lyme serology optimally.  
4  
5 231 Unfortunately, serology remains an imperfect test to diagnose this disease, and more accurate  
6  
7 232 diagnostic tests with better sensitivity and specificity would be helpful.  
8  
9

10 233

11  
12 234

13  
14 235

15  
16 236

17  
18  
19 237 **Figure 1:** Flow diagram of the study cases identification

20  
21 238 Footnote: Cases with positive IgM include 13 IgG negative, 12 IgG positive and 4 undetermined  
22  
23 239 for IgG. EIA: Enzyme Immunoassay.  
24  
25

26 240

27  
28 241

29  
30 242

31  
32 243

33  
34  
35 244 **Figure 2:** Absolute number of persons for whom a Lyme serology request was sent to the

36  
37 245 Brome-Missisquoi-Perkins Hospital by year (Figure 2a) and by month (Figure 2b) to

38  
39 246 demonstrate seasonal and temporal variations. Positive results are in dark grey, and negative

40  
41 247 results in pale grey.  
42  
43

44 248

45  
46 249

47  
48 250

49  
50 251

51  
52 252

53  
54  
55  
56  
57  
58  
59  
60

**REFERENCES**

- 1  
2  
3 253  
4 254  
5 255 1. Ogden NH, Lindsay LR, Morshed M, Sockett PN, Artsob H. The emergence of Lyme disease  
6  
7  
8 256 in Canada. *CMAJ* **2009**; 180:1221-4.
- 9  
10 257 2. Gasmi S, Ogden NH, Leighton PA, Lindsay LR, Thivierge K. Analysis of the human  
11  
12 258 population bitten by *Ixodes scapularis* ticks in Quebec, Canada: Increasing risk of Lyme disease.  
13  
14 259 *Ticks Tick Borne Dis* **2016**; 7:1075-81.
- 15  
16  
17 260 3. Ogden NH, Feil EJ, Leighton PA, et al. Evolutionary aspects of emerging Lyme disease in  
18  
19 261 Canada. *Appl Environ Microbiol* **2015**; 81:7350-9.
- 20  
21 262 4. Adam-Poupart A, Thivierge A, Milord F, INSPQ. Rapport de surveillance de la maladie de  
22  
23 263 Lyme : année 2015: Bibliothèque et Archives nationales du Québec, **2016**.
- 24  
25  
26 264 5. Ferrouillet C, Fortin A, Milord F, et al. Proposition d'un programme pour la surveillance  
27  
28 265 intégrée de la maladie de Lyme et des autres maladies transmises par la tique *Ixodes scapularis*  
29  
30 266 au Québec: Bibliothèque et Archives nationales du Québec, **2014**.
- 31  
32  
33 267 6. Lambert L, Drapeau M, Milord F, Serhir B, Trudel L, Doucet A. Guide d'intervention - La  
34  
35 268 maladie de Lyme. La Direction des communications du ministère de la Santé et des Services  
36  
37 269 sociaux ed: Bibliothèque et Archives nationales du Québec, **2013**.
- 38  
39  
40 270 7. Adam-Poupart A, Thivierge K. Proposition d'un programme pour la surveillance intégrée de  
41  
42 271 la maladie de Lyme et des autres maladies transmises par la tique *Ixodes scapularis* au Québec -  
43  
44 272 Mise à Jour 2015. In: Québec Indsp, ed: Bibliothèque et Archives nationales du Québec, **2015**.
- 45  
46  
47 273 8. Centers for Disease Control and Prevention: Lyme Disease.  
48  
49 274 <https://www.cdc.gov/lyme/diagnostesting/labtest/twostep/index.html>: CDC, Atlanta, USA.,  
50  
51 275 **2015**.

- 1  
2  
3 276 9. Simon JA, Marrotte RR, Desrosiers N, et al. Climate change and habitat fragmentation drive  
4  
5 277 the occurrence of *Borrelia burgdorferi*, the agent of Lyme disease, at the northeastern limit of its  
6  
7 278 distribution. *Evol Appl* **2014**; 7:750-64.
- 9  
10 279 10. Gasmi S, Ogden NH, Leighton PA, et al. Practices of Lyme disease diagnosis and treatment  
11  
12 280 by general practitioners in Quebec, 2008-2015. *BMC Fam Pract* **2017**; 18:65.
- 14  
15 281 11. Lindsay LR, Bernat K, Dibernardo A. Laboratory diagnostics for Lyme disease. Vol. 40-11:  
16  
17 282 National Microbiology Laboratory, Public Health Agency of Canada, Winnipeg, Manitoba,  
18  
19 283 **2014**.
- 21  
22 284 12. Canadian Public Health Laboratory N. The laboratory diagnosis of Lyme borreliosis:  
23  
24 285 Guidelines from the Canadian Public Health Laboratory Network. *Can J Infect Dis Med*  
25  
26 286 *Microbiol* **2007**; 18:145-8.
- 28  
29 287 13. Wormser GP, Dattwyler RJ, Shapiro ED, et al. The clinical assessment, treatment, and  
30  
31 288 prevention of lyme disease, human granulocytic anaplasmosis, and babesiosis: clinical practice  
32  
33 289 guidelines by the Infectious Diseases Society of America. *Clin Infect Dis* **2006**; 43:1089-134.
- 35  
36 290 14. Lyme Disease (*Borrelia burgdorferi*) 2017 Case Definition: Centre for Disease Control and  
37  
38 291 Prevention, **2017**.
- 39  
40 292 15. Cooper L, Branagan-Harris M, Tuson R, Nduka C. Lyme disease and Bell's palsy: an  
41  
42 293 epidemiological study of diagnosis and risk in England. *Br J Gen Pract* **2017**; 67:e329-e35.
- 44  
45 294 16. Jones EH, Hinckley AF, Hook SA, et al. Pet ownership increases human risk of encountering  
46  
47 295 ticks. *Zoonoses Public Health* **2017**.
- 48  
49 296 17. Bouchard C, Leonard E, Koffi JK, et al. The increasing risk of Lyme disease in Canada. *Can*  
50  
51 297 *Vet J* **2015**; 56:693-9.

298

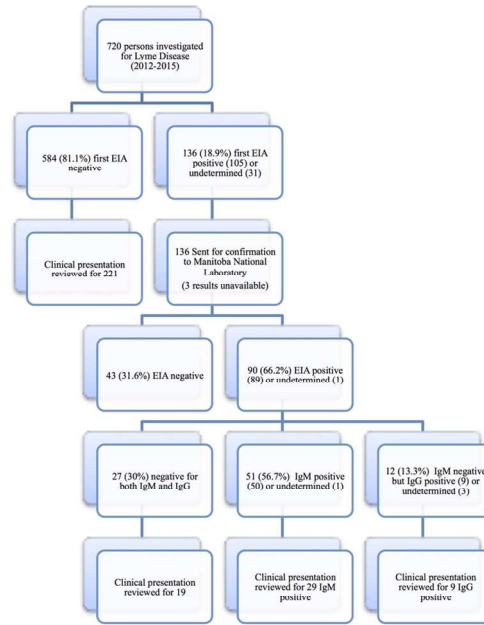

Figure 1: Flow diagram of the study cases identification  
Footnote: Cases with positive IgM include 13 IgG negative, 12 IgG positive and 4 undetermined for IgG.  
EIA: Enzyme Immunoassay.

127x95mm (300 x 300 DPI)

1  
2  
3  
4  
5  
6  
7  
8  
9  
10  
11  
12  
13  
14  
15  
16  
17  
18  
19  
20  
21  
22  
23  
24  
25  
26  
27  
28  
29  
30  
31  
32  
33  
34  
35  
36  
37  
38  
39  
40  
41  
42  
43  
44  
45  
46  
47  
48  
49  
50  
51  
52  
53  
54  
55  
56  
57  
58  
59  
60

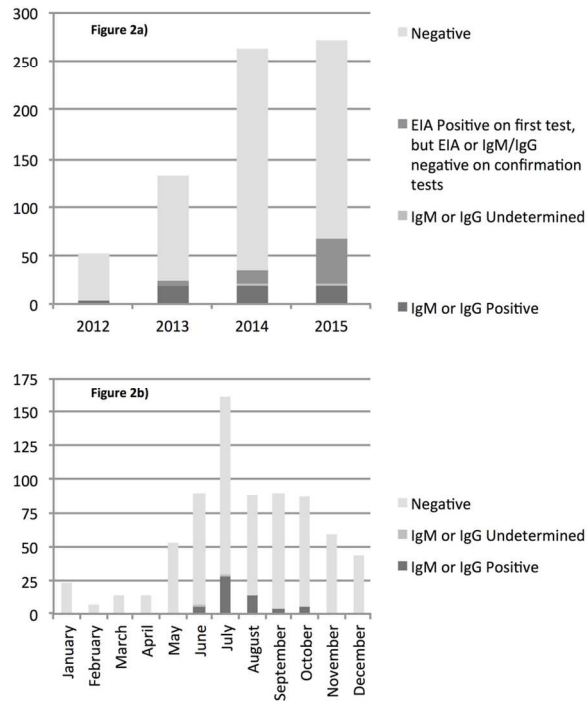

Figure 2: Absolute number of persons for whom a Lyme serology request was sent to the Brome-Missisquoi-Perkins Hospital by year (Figure 2a) and by month (Figure 2b) to demonstrate seasonal and temporal variations. Positive results are in dark grey, and negative results in pale grey.

127x95mm (300 x 300 DPI)

**Table 1. Characteristics of the study population with a positive Lyme serology (IgM or IgG) for requested through the Brome-Missisquoi-Perkins Hospital**

| Characteristic                | All<br>(IgM or IgG positive)<br>N=59 | IgM positive<br>N=50 |
|-------------------------------|--------------------------------------|----------------------|
|                               | N (%)                                | N (%)                |
| <b>Age categories (years)</b> |                                      |                      |
| <= 19                         | 7 (11.86)                            | 5 (10.00)            |
| 20-39                         | 21 (35.59)                           | 18 (36.00)           |
| 40-59                         | 17 (28.81)                           | 14 (28.00)           |
| 60+                           | 14 (23.73)                           | 13 (26.00)           |
| <b>Sex</b>                    |                                      |                      |
| Male                          | 40 (67.80)                           | 34 (68.00)           |
| Female                        | 19 (32.20)                           | 16 (32.00)           |
| <b>Area of residence</b>      |                                      |                      |
| Lac Brome                     | 11 (18.64)                           | 9 (18.00)            |
| Bedford                       | 8 (13.56)                            | 8 (16.00)            |
| Cowansville                   | 16 (27.12)                           | 12 (24.00)           |
| Bromont                       | 19 (32.20)                           | 18 (36.00)           |
| Farnham                       | 2 (3.39)                             | 1 (2.00)             |
| Other                         | 3 (5.08)                             | 2 (4.00)             |
| <b>Year of serology</b>       |                                      |                      |
| 2012                          | 3 (5.08)                             | 2 (4.00)             |
| 2013                          | 19 (32.20)                           | 18 (36.00)           |
| 2014                          | 19 (32.20)                           | 17 (34.00)           |
| 2015                          | 18 (30.51)                           | 13 (26.00)           |



**Table 2. Clinical history reported in the medical charts of Brome-Missisquoi-Perkins Hospital or La Pommeraiie Family Medicine Unit for patients with positive Lyme serology**

| Signs and Symptoms                       | All<br>(IgM or IgG positive)<br>N=38 | IgM positive<br>N=29 |
|------------------------------------------|--------------------------------------|----------------------|
|                                          | N (%)                                | N (%)                |
| <b>Systemic Symptoms</b>                 |                                      |                      |
| Any                                      | 30 (78.95)                           | 25 (86.21)           |
| Fever (reported or objective)            | 20 (52.63)                           | 17 (58.62)           |
| Fatigue                                  | 18 (47.37)                           | 14 (48.28)           |
| Headaches                                | 12 (31.58)                           | 10 (34.48)           |
| Anorexia                                 | 5 (13.16)                            | 5 (17.24)            |
| Lymphadenopathy                          | 3 (7.89)                             | 3 (10.34)            |
| Malaise                                  | 9 (23.68)                            | 7 (24.14)            |
| Lethargy                                 | 2 (5.26)                             | 1 (3.45)             |
| <b>Cutaneous Symptoms</b>                |                                      |                      |
| Any                                      | 27 (71.05)                           | 23 (79.31)           |
| Erythema Migrans                         | 15 (39.47)                           | 14 (48.28)           |
| Rash (not specified as Erythema Migrans) | 8 (21.05)                            | 6 (20.69)            |
| Cellulitis                               | 2 (5.26)                             | 2 (6.90)             |
| Ulcers                                   | 0                                    | 0                    |
| <b>Musculo-skeletal symptoms</b>         |                                      |                      |
| Any                                      | 20 (52.63)                           | 13 (44.83)           |
| Myalgia                                  | 15 (39.47)                           | 12 (41.38)           |
| Arthralgia                               | 7 (18.42)                            | 4 (13.79)            |
| Migratory pains                          | 3 (7.89)                             | 3 (10.34)            |
| Arthritis                                | 4 (10.53)                            | 1 (3.45)             |
| <b>Neurological Symptoms</b>             |                                      |                      |
| Any                                      | 7 (18.42)                            | 5 (17.24)            |
| Nuchal rigidity                          | 2 (5.26)                             | 1 (3.45)             |
| Facial Paralysis                         | 4 (10.53)                            | 3 (10.34)            |
| Meningitis                               | 0                                    | 0                    |
| Encephalitis                             | 0                                    | 0                    |
| Polyradiculopathy                        | 1 (2.63)                             | 1 (3.45)             |
| <b>Cardiac Symptoms</b>                  |                                      |                      |
| Any                                      | 2 (5.26)                             | 2 (6.90)             |
| AV Block                                 | 2 (5.26)                             | 2 (6.90)             |
| Myocarditis                              | 0                                    | 0                    |
| Pericarditis                             | 0                                    | 0                    |
| <b>Ophthalmic Symptoms</b>               |                                      |                      |
| Any                                      | 1 (2.63)                             | 1 (3.45)             |
| Conjunctivitis                           | 1 (2.63)                             | 1 (3.45)             |
| Keratitis                                | 0                                    | 0                    |
| Uveitis                                  | 0                                    | 0                    |
| Optic neuritis                           | 0                                    | 0                    |
| <b>Travel</b>                            |                                      |                      |
| Reported travel in New England           | 3 (7.89)                             | 3 (10.34)            |
| <b>Tick bite reported</b>                | 12 (31.58)                           | 11 (37.93)           |
| <b>Tick brought for analysis</b>         | 0                                    | 0                    |
