# Supplementary material
Source: PubMed Central journal article supplement (PMC5878960)
Supplement: supp_6.1.E139_strobe.pdf [file supp_6.1.E139_strobe.pdf]

STROBE Statement—Checklist of items that should be included in reports of observational studies

|                              | Item No | Recommendation                                                                                                                                                                                                                                                                                                                                                                                                                                                       |
|------------------------------|---------|----------------------------------------------------------------------------------------------------------------------------------------------------------------------------------------------------------------------------------------------------------------------------------------------------------------------------------------------------------------------------------------------------------------------------------------------------------------------|
| <b>Title and abstract</b>    | 1       | (a) Indicate the study’s design with a commonly used term in the title or the abstract<br><b>Title: retrospective descriptive study</b><br>(b) Provide in the abstract an informative and balanced summary of what was done and what was found<br><b>Page 2, lines 28-41</b>                                                                                                                                                                                         |
| <b>Introduction</b>          |         |                                                                                                                                                                                                                                                                                                                                                                                                                                                                      |
| Background/rationale         | 2       | Explain the scientific background and rationale for the investigation being reported<br><b>Page 3, lines 48-61</b>                                                                                                                                                                                                                                                                                                                                                   |
| Objectives                   | 3       | State specific objectives, including any prespecified hypotheses<br><b>Page 3, lines 62-66</b>                                                                                                                                                                                                                                                                                                                                                                       |
| <b>Methods</b>               |         |                                                                                                                                                                                                                                                                                                                                                                                                                                                                      |
| Study design                 | 4       | Present key elements of study design early in the paper<br><b>Page 5, lines 94-121</b>                                                                                                                                                                                                                                                                                                                                                                               |
| Setting                      | 5       | Describe the setting, locations, and relevant dates, including periods of recruitment, exposure, follow-up, and data collection<br><b>Page 4, lines 70-92</b>                                                                                                                                                                                                                                                                                                        |
| Participants                 | 6       | (a) Give the eligibility criteria, and the sources and methods of selection of participants<br><b>Page 5, lines 97-99 &amp; lines 104-107</b>                                                                                                                                                                                                                                                                                                                        |
| Variables                    | 7       | Clearly define all outcomes, exposures, predictors, potential confounders, and effect modifiers. Give diagnostic criteria, if applicable<br><b>Page 5-6, lines 97-130</b>                                                                                                                                                                                                                                                                                            |
| Data sources/<br>measurement | 8*      | For each variable of interest, give sources of data and details of methods of assessment (measurement). Describe comparability of assessment methods if there is more than one group<br><b>Page 5-6, lines 97-130</b>                                                                                                                                                                                                                                                |
| Bias                         | 9       | Describe any efforts to address potential sources of bias<br><b>Page 5-6, lines 97-130</b>                                                                                                                                                                                                                                                                                                                                                                           |
| Study size                   | 10      | Explain how the study size was arrived at<br><b>Page 5-6, lines 97-99 &amp; 104-107</b>                                                                                                                                                                                                                                                                                                                                                                              |
| Quantitative variables       | 11      | Explain how quantitative variables were handled in the analyses. If applicable, describe which groupings were chosen and why<br><b>There are no quantitative variables</b>                                                                                                                                                                                                                                                                                           |
| Statistical methods          | 12      | (a) Describe all statistical methods, including those used to control for confounding<br><b>Page 6, lines 123-130</b><br>(b) Describe any methods used to examine subgroups and interactions<br><b>Page 6, lines 123-130</b><br>(c) Explain how missing data were addressed<br><b>Page 5, lines 105-107</b><br>(d) If applicable, describe analytical methods taking account of sampling strategy<br><b>Not applicable.</b><br>(e) Describe any sensitivity analyses |

Not applicable.

| <b>Results</b>           |     |                                                                                                                                                                                                                                                                                                                                                                                                                                                                                                                                                               |
|--------------------------|-----|---------------------------------------------------------------------------------------------------------------------------------------------------------------------------------------------------------------------------------------------------------------------------------------------------------------------------------------------------------------------------------------------------------------------------------------------------------------------------------------------------------------------------------------------------------------|
| Participants             | 13* | <p>(a) Report numbers of individuals at each stage of study—eg numbers potentially eligible, examined for eligibility, confirmed eligible, included in the study, completing follow-up, and analysed<br/><a href="#">Page 6-7, lines 134-135, 151-152</a></p> <p>(b) Give reasons for non-participation at each stage<br/><a href="#">Refer to exclusion criteria.</a></p> <p>(c) Consider use of a flow diagram<br/><a href="#">A flow diagram is included.</a></p>                                                                                          |
| Descriptive data         | 14* | <p>(a) Give characteristics of study participants (eg demographic, clinical, social) and information on exposures and potential confounders<br/><a href="#">Page 7, 146-150; Table 1.</a></p> <p>(b) Indicate number of participants with missing data for each variable of interest<br/><a href="#">As data was obtained through chart reviews, there were no missing data for socio-demographic characteristics, and missing information were categorised as “No” for symptoms, as specified in the Methods section Page 6, line 128.</a></p>               |
| Outcome data             | 15* | <p>Report numbers of outcome events or summary measures<br/><a href="#">Lines 126-144</a></p>                                                                                                                                                                                                                                                                                                                                                                                                                                                                 |
| Main results             | 16  | <p>(a) Give unadjusted estimates and, if applicable, confounder-adjusted estimates and their precision (eg, 95% confidence interval). Make clear which confounders were adjusted for and why they were included<br/><a href="#">Lines 147-150</a></p> <p>(b) Report category boundaries when continuous variables were categorized<br/><a href="#">Table 1 (age).</a></p> <p>(c) If relevant, consider translating estimates of relative risk into absolute risk for a meaningful time period<br/><a href="#">Not applicable, descriptive study only.</a></p> |
| Other analyses           | 17  | <p>Report other analyses done—eg analyses of subgroups and interactions, and sensitivity analyses<br/><a href="#">Not applicable</a></p>                                                                                                                                                                                                                                                                                                                                                                                                                      |
| <b>Discussion</b>        |     |                                                                                                                                                                                                                                                                                                                                                                                                                                                                                                                                                               |
| Key results              | 18  | <p>Summarise key results with reference to study objectives<br/><a href="#">Page 8, lines 175-182</a></p>                                                                                                                                                                                                                                                                                                                                                                                                                                                     |
| Limitations              | 19  | <p>Discuss limitations of the study, taking into account sources of potential bias or imprecision. Discuss both direction and magnitude of any potential bias<br/><a href="#">Lines 213-243</a></p>                                                                                                                                                                                                                                                                                                                                                           |
| Interpretation           | 20  | <p>Give a cautious overall interpretation of results considering objectives, limitations, multiplicity of analyses, results from similar studies, and other relevant evidence<br/><a href="#">Lines 175-252</a></p>                                                                                                                                                                                                                                                                                                                                           |
| Generalisability         | 21  | <p>Discuss the generalisability (external validity) of the study results<br/><a href="#">Lines 242-243</a></p>                                                                                                                                                                                                                                                                                                                                                                                                                                                |
| <b>Other information</b> |     |                                                                                                                                                                                                                                                                                                                                                                                                                                                                                                                                                               |
| Funding                  | 22  | <p>Give the source of funding and the role of the funders for the present study and, if applicable, for the original study on which the present article is based<br/><a href="#">Page 1, lines 15-17</a></p>                                                                                                                                                                                                                                                                                                                                                  |

\*Give information separately for exposed and unexposed groups.

**Note:** An Explanation and Elaboration article discusses each checklist item and gives methodological background and published examples of transparent reporting. The STROBE checklist is best used in conjunction with this article (freely available on the Web sites of PLoS Medicine at <http://www.plosmedicine.org/>, Annals of Internal Medicine at <http://www.annals.org/>, and Epidemiology at <http://www.epidem.com/>). Information on the STROBE Initiative is available at [www.strobe-statement.org](http://www.strobe-statement.org).
